# Supplementary material
Source: publisher figshare collection journal article supplement (https://acs.figshare.com/ndownloader/files/5501672)

## Supporting Information

### **Tailoring the Electronic and Magnetic Properties of Two-dimensional Silicon Carbide Sheets and Nanoribbons by Fluorination**

Zhiming Shi<sup>†,§</sup>, Alex Kutana<sup>‡</sup>, Guangtao Yu<sup>†</sup>, Wei Chen<sup>†</sup>, Boris I. Yakobson<sup>‡</sup>, Udo Schwingenschlogl<sup>\*,§</sup>  
and Xuri Huang<sup>\*,†</sup>

<sup>†</sup> Institute of Theoretical Chemistry, Jilin University, Changchun 130023, People's Republic of China

<sup>‡</sup> Department of Materials Science and NanoEngineering, Department of Chemistry, and the Smalley Institute for Nanoscale Science and Technology, Rice University, Houston, Texas 77005, United States.

<sup>§</sup> King Abdullah University of Science and Technology (KAUST), Physical Science and Engineering Division (PSE), Thuwal 23955-6900, Saudi Arabia

\* To whom correspondence should be addressed. Email: Udo.Schwingenschlogl@kaust.edu.sa or huangxr@jlu.edu.cn.

**Table S1.** Bond lengths of 2D-*f*F-chair-SiC obtained for cutoff energies of 360 and 500 eV.

| Bond length (Å) | C-Si  | C-F   | Si-F  |
|-----------------|-------|-------|-------|
| 360 eV          | 1.912 | 1.442 | 1.605 |
| 500 eV          | 1.912 | 1.449 | 1.609 |

**Figure S1.** Band structure of 2D-*f*F-chair-SiC obtained for a cutoff energy of 500 eV.

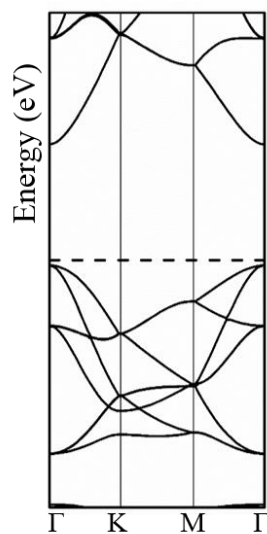

**Figure S2.** Snapshot of the fully fluorinated SiC sheet in chair conformation at the end of the BOMD calculation.

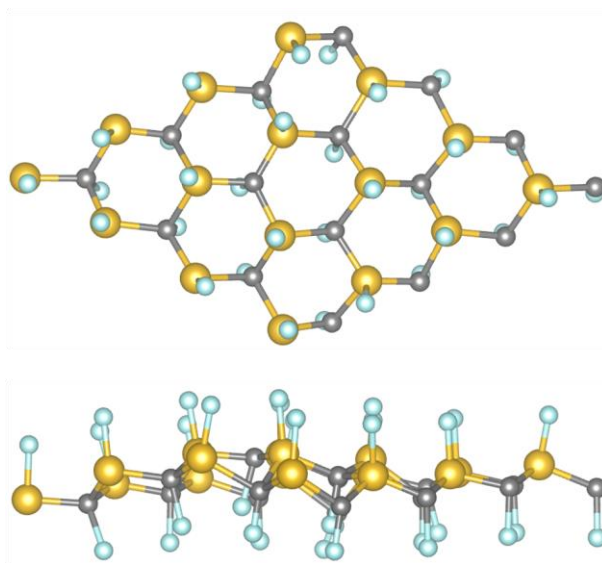

**Figure S3.** Band structures of 2D-*f*F-boat-SiC (left) and 2D-*f*F-stirrup-SiC (right).

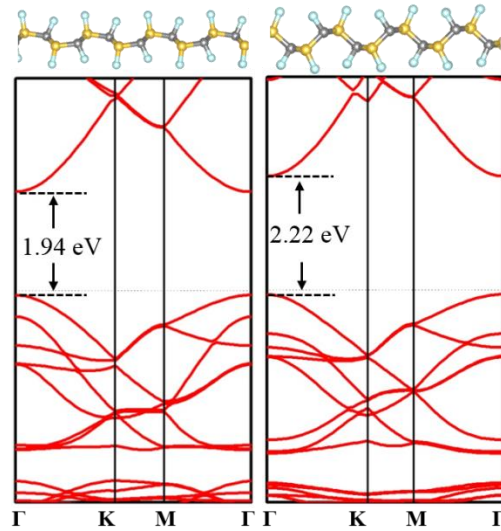

**Figure S4.** Structural transition with increasing F concentration in the  $3\times 3$  supercell. The four ground states are marked by dashed boxes.

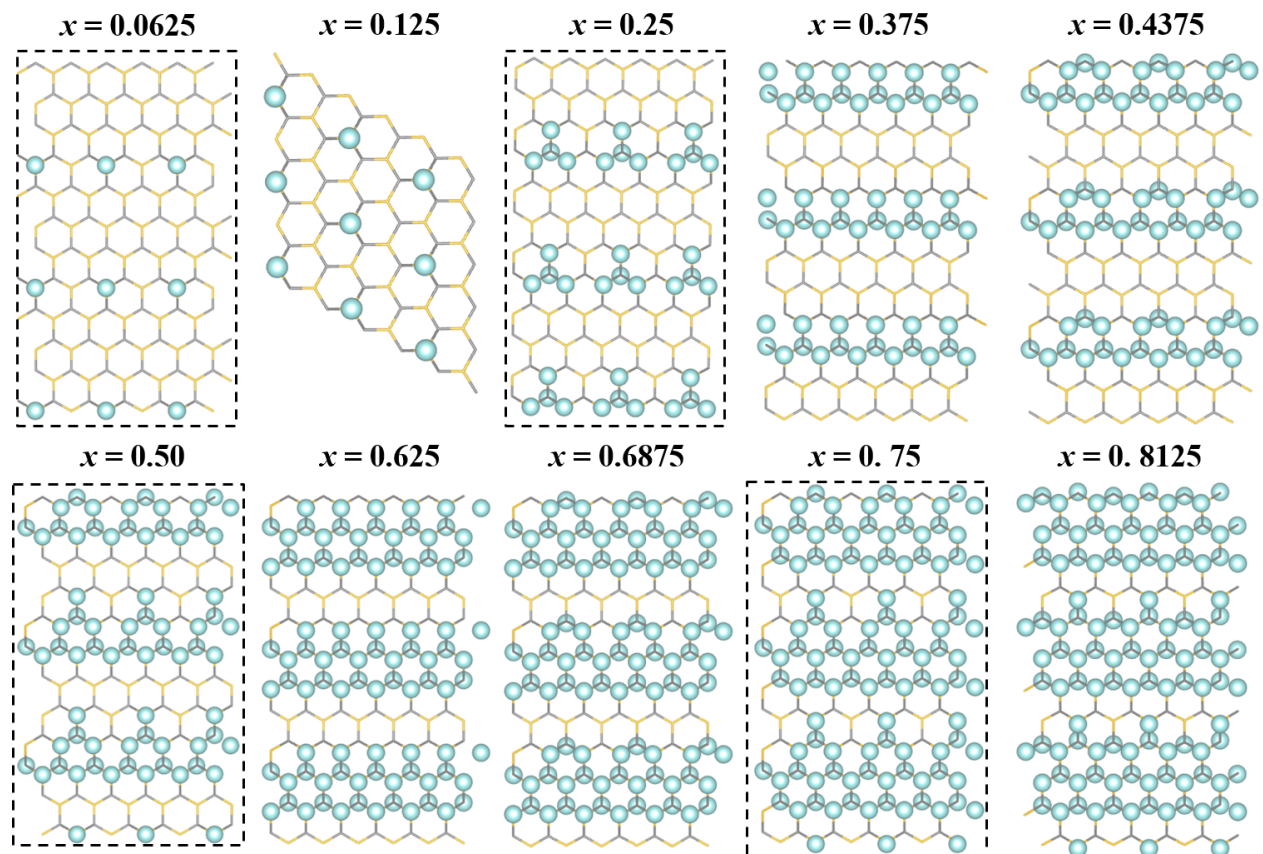

**Figure S5.** DOSs of the partially fluorinated SiC sheet. Gray shadows show the total DOS, red and blue curves the contributions of the  $sp^2$ -C atoms in the spin-up and spin-down channels, respectively.

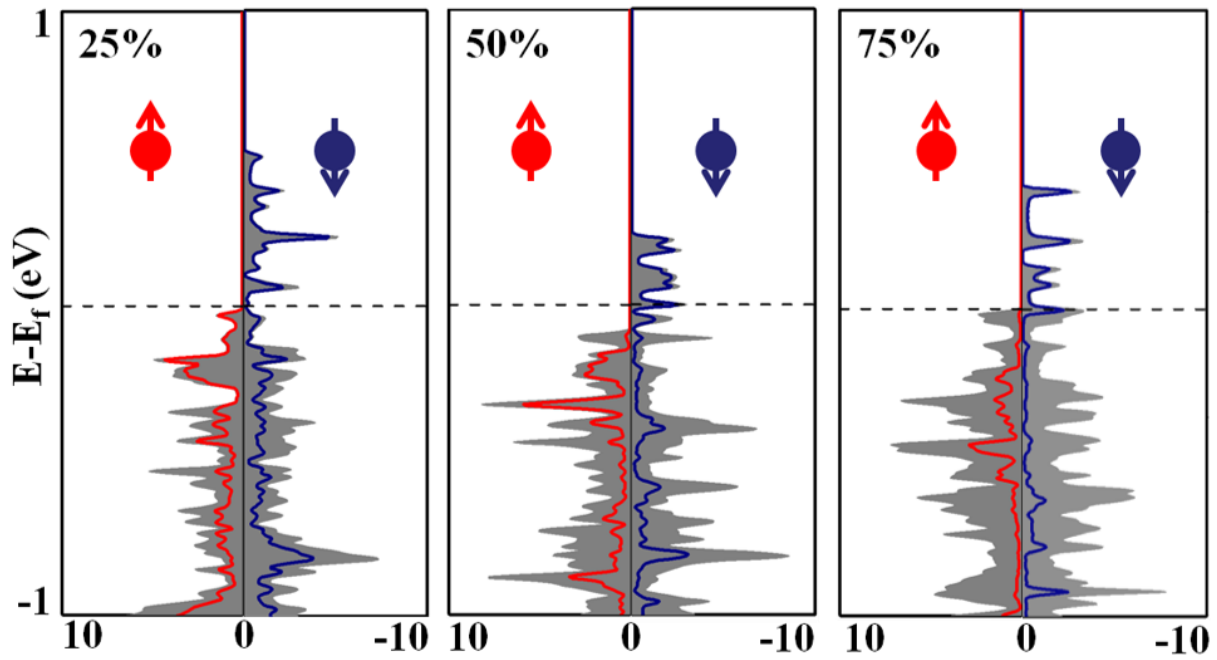

Supplement: Supplementary file 1 [file 5501672]
